# Supplementary material for: Highly oriented quasi-2D layered tin halide perovskites with 2-thiopheneethylammonium iodide for efficient and stable tin perovskite solar cells
Source: Royal Society of Chemistry journal article supplement (doi:10.1039/d1nj05178d), 2021-12-17
Supplement: d1nj05178d1.pdf [file d1nj05178d1.pdf]

# Highly oriented quasi-2D layered tin halide perovskites with 2-thiopheneethylammonium iodide for efficient and stable tin perovskite solar cells

**Authors:** Yanting Xu,<sup>a,b</sup> Ke-Jian Jiang,<sup>\*b</sup> Pengcheng Wang,<sup>a,b</sup> Wei-Min Gu,<sup>b</sup> Guang-Hui Yu,<sup>b</sup> Xueqin Zhou<sup>\*a</sup> and Yanlin Song<sup>\*b</sup>

## **Affiliations:**

<sup>a</sup>*School of Chemical Engineering and Technology, Tianjin University, Tianjin, 300072, P. R. China.*

<sup>b</sup>*Key Laboratory of Green Printing, Institute of Chemistry, CAS, Beijing, 100190, P. R. China.*

\*Corresponding author.

*E-mail address:* [kjjiang@iccas.ac.cn](mailto:kjjiang@iccas.ac.cn), [zhouxueqin@tju.edu.cn](mailto:zhouxueqin@tju.edu.cn), [yisong@iccas.ac.cn](mailto:yisong@iccas.ac.cn)

## Supporting information

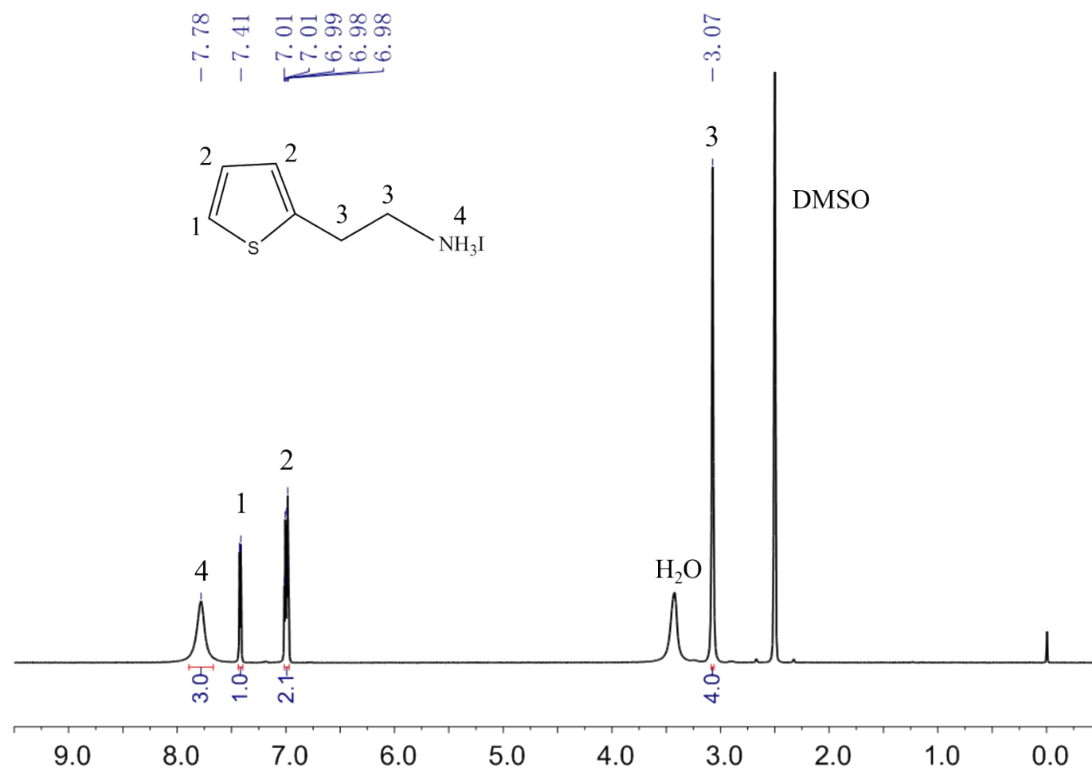

**Fig. S1.** The  $^1\text{H}$  NMR spectrum of TEAI.

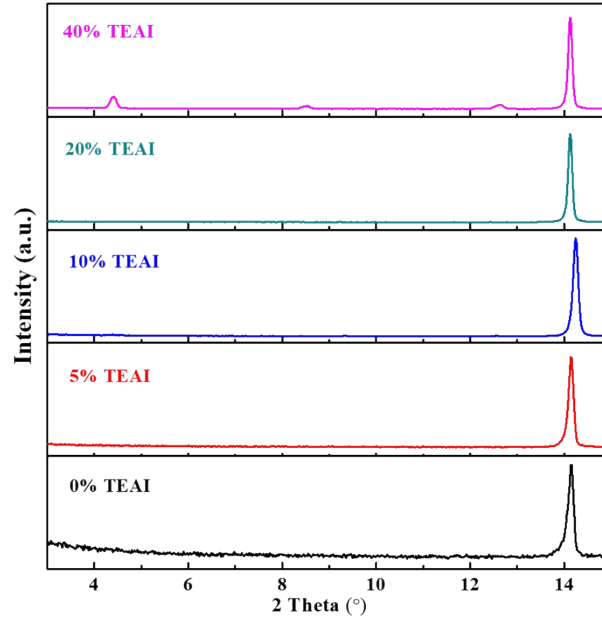

**Fig. S2.** The enlarged XRD pattern of the pristine MASnI<sub>3</sub> film and the MASnI<sub>3</sub> films with different amounts of TEAI, from range 3°-15°.

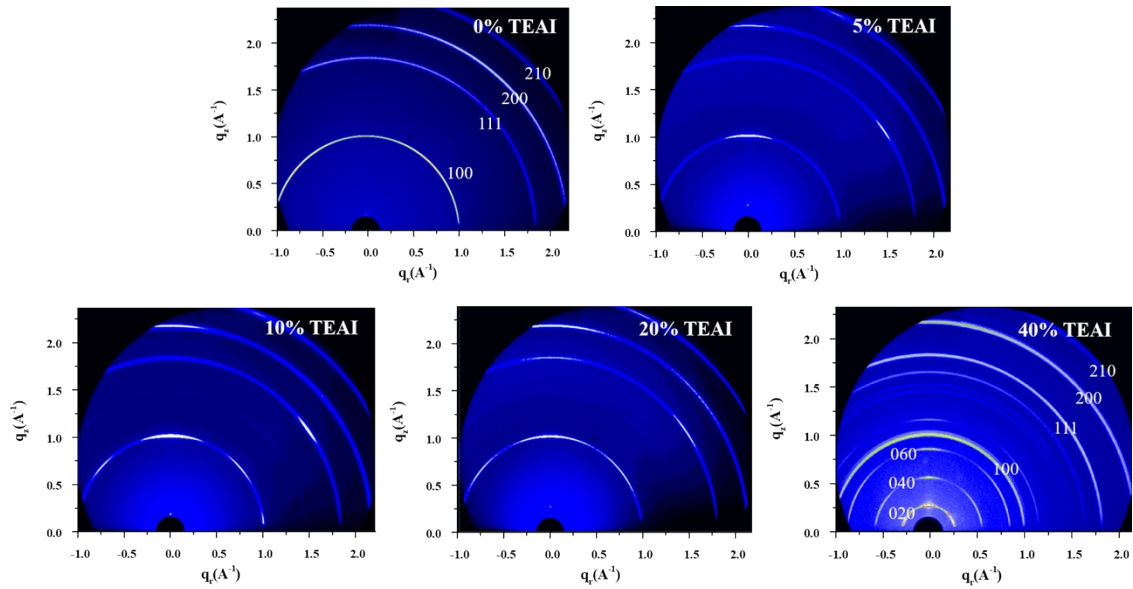

**Fig. S3.** GIWAXS images of the perovskite films with 0%, 5%, 10%, 20%, and 40% TEAI, respectively.

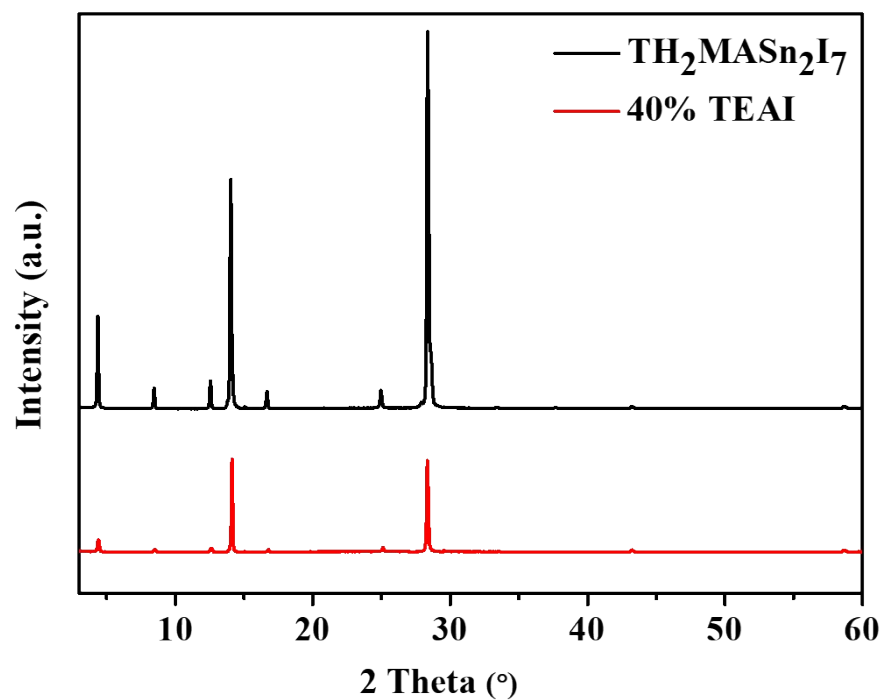

**Fig. S4.** XRD patterns of the  $\text{TH}_2\text{MASn}_2\text{I}_7$  film and the 40% TEAI film.

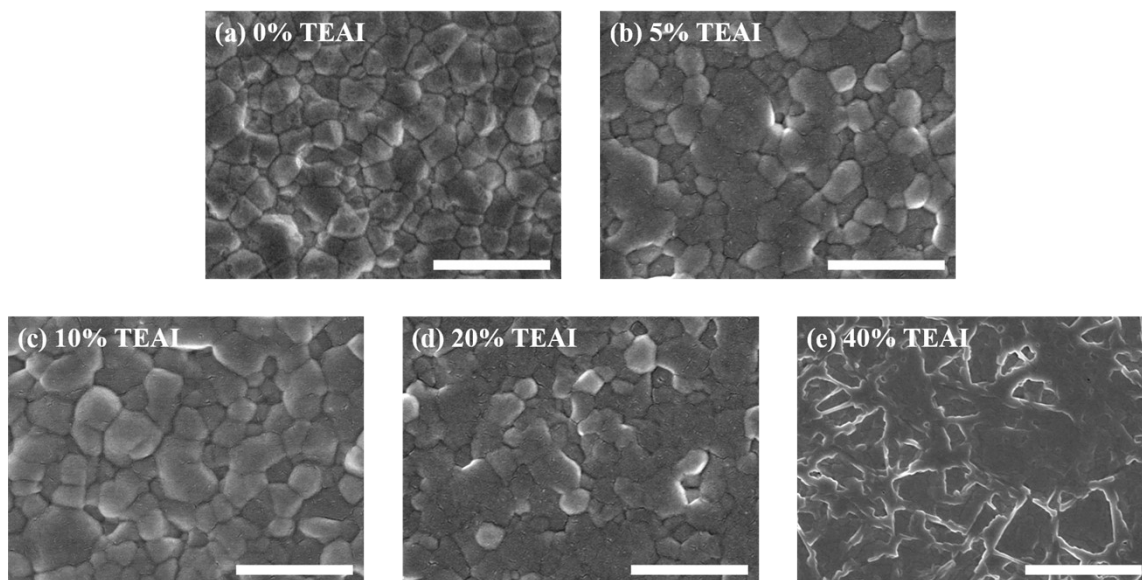

**Fig. S5.** Surface SEM images of the perovskite films with 0%, 5%, 10%, 20%, and 40% TEAI, respectively.

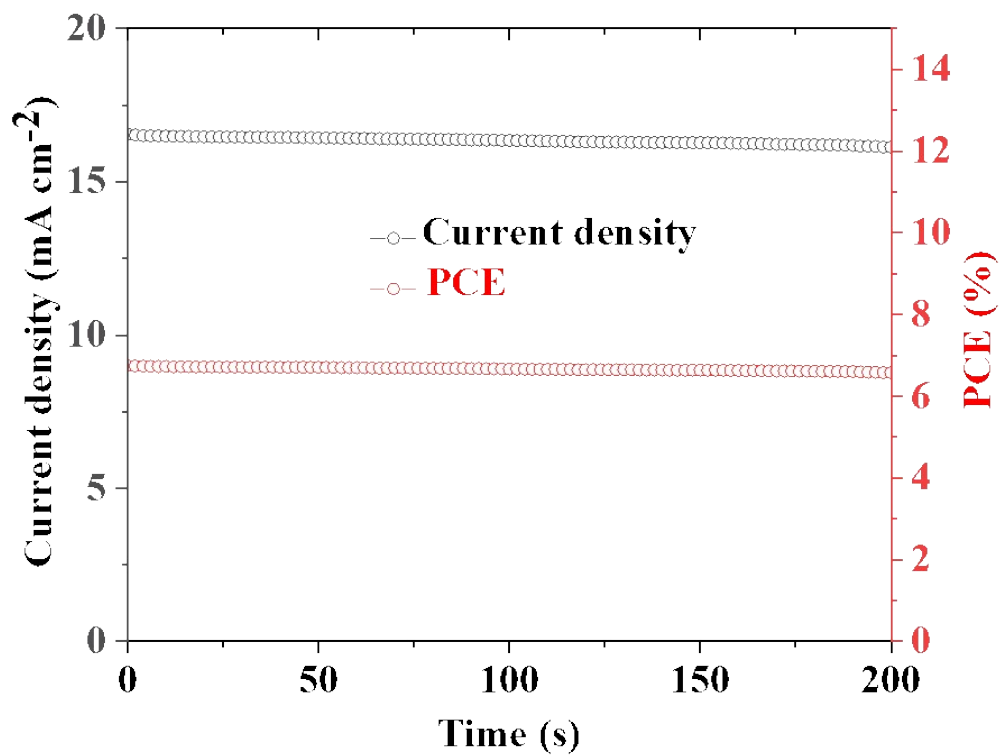

**Fig. S6.** Stabilized current and power output of the device with 10% TEAI, monitored under a constant bias of 0.41 V.

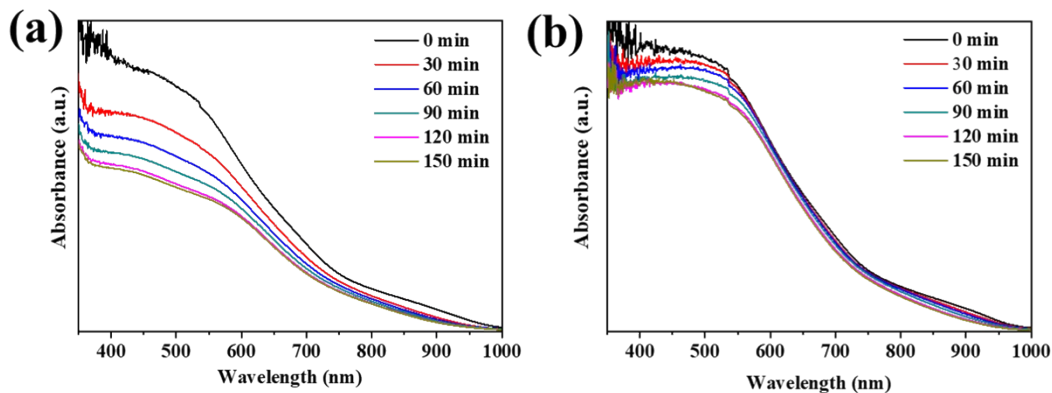

**Fig. S7.** UV-vis absorption spectra of perovskite films without (a) and with 10% TEAI (b), stored in air at 25 ~ 35 °C and 30 ~ 45% RH.

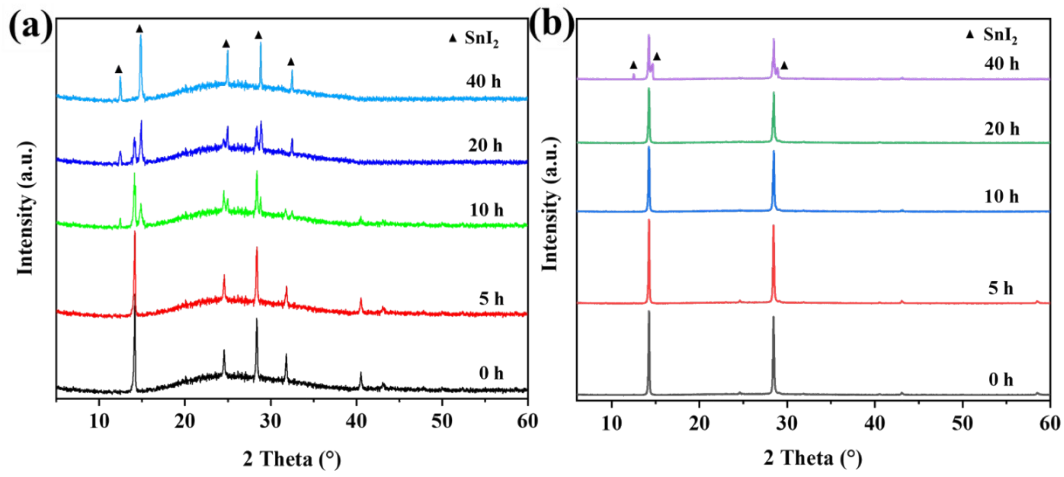

**Fig. S8.** XRD patterns of perovskite films without (a) and with 10% TEAI (b), stored in air at 25 ~ 35 °C and 30 ~ 45% RH.

**Table S1** TRPL characteristics values of the control and 10% TEAI perovskite (the effect of IRF has been eliminated by deconvolution during the fitting process)

| Samples       | $\tau_1$ (ns) | $\tau_2$ (ns) | $A_1$ (%) | $A_2$ (%) | $\tau_{ave}$ (ns) |
|---------------|---------------|---------------|-----------|-----------|-------------------|
| Control       | 0.147394      | 1.126329      | 212.88935 | 370.22434 | 0.7689            |
| With 10% TEAI | 11.66845      | 0.65143       | 336.59982 | 488.13155 | 5.1478            |

$$\tau_{ave} = (\tau_1 * A_1 + \tau_2 * A_2) / (A_1 + A_2)$$
